1 **Title: The dual role of N6-methyladenosine on mouse maternal RNAs and 2-cell**  
2 **specific RNAs revealed by ULI-MeRIP sequencing**

3  
4 **Authors:** You Wu<sup>1\*</sup>, Xiaocui Xu<sup>2\*</sup>, Meijie Qi<sup>3\*</sup>, Chuan Chen<sup>1\*</sup>, Mengying Li<sup>3</sup>, Rushuang Yan<sup>1</sup>,  
5 Xiaochen Kou<sup>1</sup>, Yanhong Zhao<sup>1</sup>, Wenqiang Liu<sup>2</sup>, Yanhe Li<sup>1</sup>, Xuelian Liu<sup>1</sup>, Meiling Zhang<sup>4</sup>, Chengqi  
6 Yi<sup>4</sup>, Hong Wang<sup>1</sup>, Bin Shen<sup>3†</sup>, Yawei Gao<sup>1†</sup> and Shaorong Gao<sup>1, 2†</sup>  
7

8 **Affiliations:**

9 <sup>1</sup>Institute for Regenerative Medicine, Shanghai East Hospital, Shanghai Key Laboratory of Signaling  
10 and Disease Research, Frontier Science Center for Stem Cell Research, School of Life Sciences and  
11 Technology, Tongji University; Shanghai, 200120, China

12 <sup>2</sup>Clinical and Translation Research Center of Shanghai First Maternity & Infant Hospital, Frontier  
13 Science Center for Stem Cell Research, School of Life Sciences and Technology, Tongji University;  
14 Shanghai, 200092, China.

15 <sup>3</sup>State Key Laboratory of Reproductive Medicine, Center for Global Health, Department of Prenatal  
16 Diagnosis, Women's Hospital of Nanjing Medical University, Nanjing Maternity and Child Health  
17 Care Hospital, Nanjing Medical University; Nanjing, 211166, China.

18 <sup>4</sup>State Key Laboratory of Protein and Plant Gene Research, School of Life Sciences, Peking  
19 University; Beijing, 100871, China.  
20

21 \*These authors contributed equally to this work.

22 †Correspondence: binshen@njmu.edu.cn; gaoyawei@tongji.edu.cn; gaoshaorong@tongji.edu.cn  
23  
24

1 **Abstract:**

2 N<sup>6</sup>-methyladenosine (m<sup>6</sup>A) and its regulatory components play critical roles in various developmental  
3 processes in mammals(1-5). However, the landscape and function of m<sup>6</sup>A in the maternal-to-zygotic  
4 transition (MZT) remain unclear due to limited materials. Here, by developing an ultralow-input  
5 MeRIP-seq method, we revealed the dynamics of the m<sup>6</sup>A RNA methylome during the MZT process  
6 in mice. We found that more than 1/3 maternal decay and 2/3 zygotic mRNAs were modified by m<sup>6</sup>A.  
7 Moreover, m<sup>6</sup>As are highly enriched in the RNA of transposable elements MTA and MERVL, which  
8 are highly expressed in oocytes and 2-cell embryos, respectively. Notably, maternal depletion of  
9 *Kiaa1429*, a component of the m<sup>6</sup>A methyltransferase complex, leads to a reduced abundance of m<sup>6</sup>A-  
10 marked maternal RNAs, including both genes and MTA, in GV oocytes, indicating m<sup>6</sup>A-dependent  
11 regulation of RNA stability in oocytes. Interestingly, when the writers were depleted, some m<sup>6</sup>A-  
12 marked 2-cell specific RNAs, including *Zscan4* and MERVL, appeared normal at the 2-cell stage but  
13 failed to be decayed at later stages, suggesting that m<sup>6</sup>A regulates the clearance of these transcripts.  
14 Together, our study uncovered that m<sup>6</sup>As function in context-specific manners during MZT, which  
15 ensures the transcriptome stability of oocytes and regulates the stage specificity of zygotic transcripts  
16 after fertilization.

17

18 **One Sentence Summary:**

19 m<sup>6</sup>A RNA methylation stabilizes the maternal RNAs in mouse oocytes and degrades the 2-cell  
20 specific RNAs in the cleavage-stage embryos.

21

22 **Main Text:**

23 Fertilization triggers a remarkable and complex cell fate transition from oocytes to totipotent embryos,  
24 termed the maternal-to-zygotic transition, including dramatic remodeling of the chromatin epigenome,  
25 transcriptome and proteome(6). However, in mice, transcription is effectively silenced from fully  
26 grown germinal vesicle (GV) oocytes until ZGA at the late 1-cell stage. Therefore, post-  
27 transcriptional modifications regulate the storage, timely decay and sequential activation of maternal  
28 transcripts, which ensures the switch from maternal to embryonic control of gene expression.(7, 8)  
29 Although some reprogramming details of the epigenetic and chromatin landscape have been  
30 described in recent years, the various control mechanisms on RNA remain elusive.

31 In eukaryotes, N<sup>6</sup>-methyladenosine (m<sup>6</sup>A) is found on messenger RNAs (mRNAs), repeat RNAs and  
32 long noncoding RNAs (lncRNAs)(3, 4, 9-11) and participates in various important biological events  
33 by playing roles in RNA-related processes and chromatin state regulation(1, 2, 5, 12-15). A previous  
34 study in *zebrafish* found that m<sup>6</sup>A could promote maternal RNA degradation during the MZT  
35 process(16). In mammals, depletion of m<sup>6</sup>A reader proteins, such as Ythdc1 and Ythdf2, or deficiency  
36 of m<sup>6</sup>A writers, such as Mettl3/14/16 and Kiaa1429, leads to developmental defects in oocytes or  
37 early embryonic lethality(17-23), suggesting that m<sup>6</sup>A may play important roles in oocyte and early  
38 embryo development. However, genome-wide profiling and the potential roles of m<sup>6</sup>A in this process  
39 have been largely untacked due to the limited number of oocytes and preimplantation embryos. In  
40 this study, we first developed an ultralow-input MeRIP-seq (ULI-MeRIP-seq) method, which enabled  
41 the profiling of m<sup>6</sup>A RNA methylation with 50 ng of total RNA. With this method, we revealed the  
42 dynamics of the m<sup>6</sup>A landscape of the transcriptome in the MZT process from GV oocytes to 4-cell  
43 stage embryos, which covered oocyte maturation, fertilization and ZGA events in the MZT process.

44

45 **RNA m<sup>6</sup>A methylome in mice MZT**

46 To investigate the role of RNA m<sup>6</sup>A methylation during MZT in mammals, we optimized the protocol

1 of m<sup>6</sup>A RNA immunoprecipitation followed by high-throughput sequencing (MeRIP-seq)(24) and  
2 developed ultralow-input MeRIP-seq (ULI-MeRIP-seq), which can examine the m<sup>6</sup>A RNA  
3 methylome using 50 ng of total RNA (Fig. 1A and fig. S1A, see methods for details). In the  
4 preliminary experiments, 50 ng and 2 μg of total RNA from mouse ES cells was used for MeRIP-seq,  
5 and the IP efficiency was validated by qPCR of GLuc/CLuc spikes-in and endogenous mRNA *Klf4*(19)  
6 (fig. S1, B and C). The modification on pluripotency marker genes was also consistent with the  
7 previous reports(19, 25) (fig. S1D). The MeRIP-seq data generated using 50 ng total RNA were high-  
8 quality and recapitulated the results generated using 2 μg total RNA (fig. S1, E to I). We then extracted  
9 RNA samples in the MZT process, including oocytes at the GV and metaphase II (MII) stages, as  
10 well as embryos at the late 1-cell (L1C), late 2-cell (L2C) and 4-cell (4C) stages and performed LS-  
11 MS/MS (Fig. 1B). The overall abundance of m<sup>6</sup>A continuously decreased during MZT, which was  
12 quantified by LC-MS/MS (fig. S2A). We then employed ULI-MeRIP-seq to profile m<sup>6</sup>A with 50 ng  
13 total RNA for each stage with two or three replicates, and total RNA-seq of relevant samples without  
14 IP reaction was used as input. PCA of genes showed that both the transcriptome and m<sup>6</sup>A methylome  
15 diverged after 2-cell stage when major ZGA occurred (Fig. 1C). The ULI-MeRIP-seq data showed  
16 highly efficient enrichment for m<sup>6</sup>A, and all replicates, including input libraries, were highly  
17 comparable (Fig. 1C, fig. S2, B to D, and tables S1 and S2). Saturation analysis showed that our data  
18 were able to detect both high-level and low-level transcripts of genes (fig. S2E). To identify m<sup>6</sup>A-  
19 enriched sites, we performed peak calling using model-based analysis (MACS). As expected, the  
20 length distribution and enrichment of canonical [RRACH] motif (R= G/A; H= A/C/U) on m<sup>6</sup>A peaks  
21 at each stage was consistent with previous studies(9, 10); however, the density of [RRACH] at exon  
22 peaks decreased over the MZT process (fig. S3, A to C). In addition to the well-characterized  
23 enrichment of m<sup>6</sup>A methylation at coding sequences (CDSs), untranslated regions (UTRs), and near  
24 stop codons (Fig. 1D), we found that a considerable number of m<sup>6</sup>A peaks were mapped to distal  
25 intergenic regions, which was particularly high at the late 1-cell stage (fig. S3D).  
26 We then defined the m<sup>6</sup>A-marked (m<sup>6</sup>A+) genes at each stage and calculated the dynamics of m<sup>6</sup>A  
27 peaks and m<sup>6</sup>A+ genes during the MZT process. To our surprise, compared to the continuously  
28 decreased m<sup>6</sup>A/A ratio detected by LS-MS/MS, m<sup>6</sup>A peaks as well as m<sup>6</sup>A+ genes increased after  
29 fertilization (Fig. 1, E to G and fig. S3, E to G), suggesting that de novo m<sup>6</sup>A modification can be  
30 established along with ZGA. Interestingly, total m<sup>6</sup>A peaks doubled shortly after fertilization and  
31 possessed more striking dynamic changes in the 2-cell and 4-cell stages compared to those of m<sup>6</sup>A+  
32 genes. Detailed analysis revealed that the ratio of m<sup>6</sup>A peaks on transposons significantly increased  
33 in the gain peaks at late 1-cell and lost peaks at 2-/4-cell stages (fig. S3H). These data reveal a highly  
34 dynamic landscape of the m<sup>6</sup>A methylome during MZT in which de novo establishment and severe  
35 loss of m<sup>6</sup>A may occur on both genes and transposon RNAs.

36

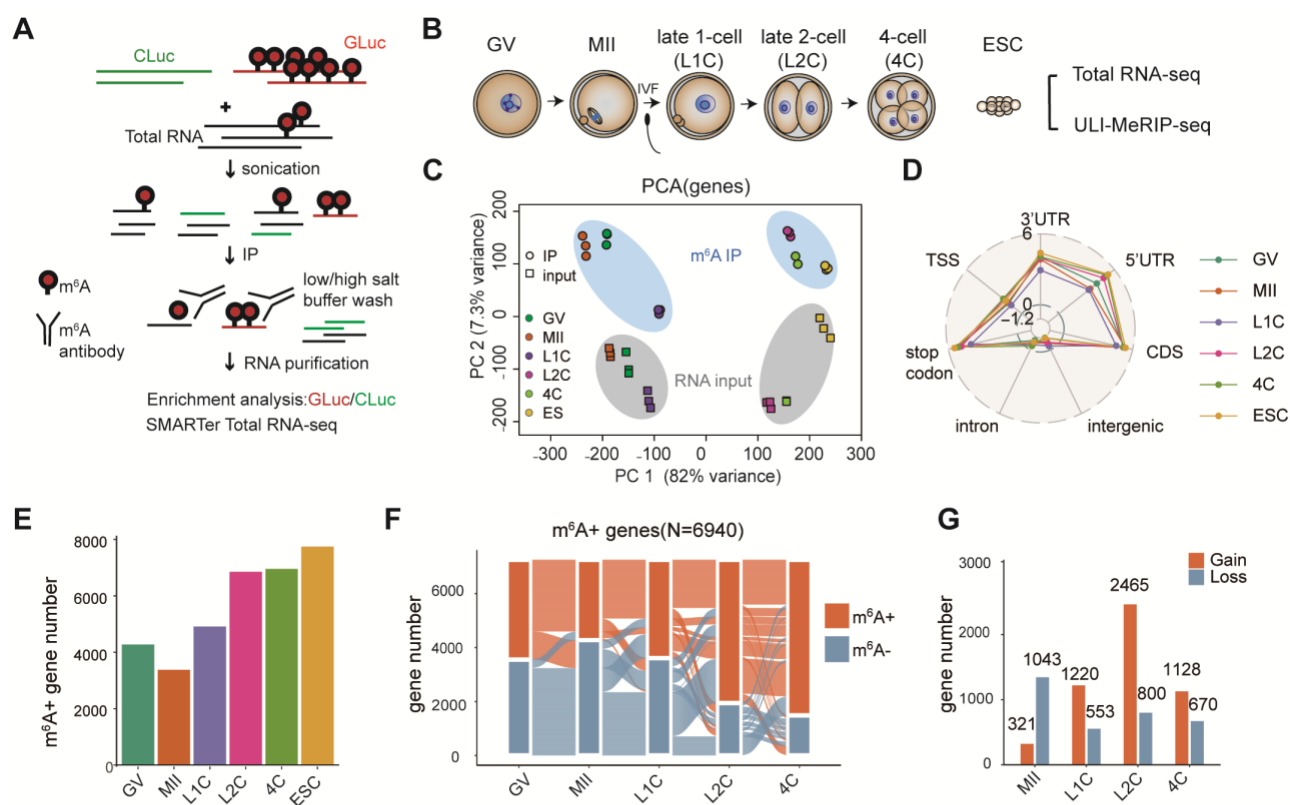

**Fig. 1. RNA m<sup>6</sup>A modification in mouse oocytes and early embryos.**

(A) Schematic diagram of the ULI-MeRIP-seq procedure. Spike-in RNAs, including unmodified control RNA (Cypridina Luciferase, CLuc) and m<sup>6</sup>A methylated control RNA (Gaussia luciferase, GLuc), were added to total RNA to monitor m<sup>6</sup>A enrichment (see methods). (B) GV and MII oocytes, late 1-cell, late 2-cell, 4-cell and mESCs were collected for total RNA-seq and ULI-MeRIP-seq. (C) Principal component analysis (PCA) of m<sup>6</sup>A and input RNA data of genes for all samples. (D) Radar chart showing the enrichment score of m<sup>6</sup>A peaks at TSS, 3'UTR, 5' UTR, CDS, intergenic, intron and stop codon. (E) The number of genes harboring m<sup>6</sup>A (m<sup>6</sup>A+) in each stage. (F) Alluvial diagram showing the global dynamics of m<sup>6</sup>A+ genes during MZT (N=6940). Each line represents a gene that is classified as a m<sup>6</sup>A+ class in at least one stage. (G) The number of genes gaining or losing m<sup>6</sup>A at each stage compared to the prior stage during MZT. The number of genes gaining or losing m<sup>6</sup>A is indicated above each bar.

1  
2  
3

## 1 **m<sup>6</sup>A marks maternal decay and ZGA genes in MZT**

2 To investigate the association between m<sup>6</sup>A methylation and the MZT process, we first analyzed the  
3 transcriptome data and identified 2,533 maternal decay genes (termed MD genes) and 1,115 ZGA  
4 genes based on their abundance change over the MZT process (Fig. 2A, see methods and table S3).  
5 We then found that 43% of MD genes were marked by m<sup>6</sup>A in GV or MII oocytes, which exhibited a  
6 decreased m<sup>6</sup>A signal around the stop codon throughout the MZT process (Fig. 2A and fig. S4A).  
7 Gene ontology (GO) analyses showed that m<sup>6</sup>A unmarked (m<sup>6</sup>A<sup>-</sup>) MD genes were significantly  
8 enriched in energy metabolism pathways, including mitochondrial organization and cellular  
9 respiration, such as the Nduf family and Atp family (Fig. 2B and fig. S4B). Meanwhile, m<sup>6</sup>A<sup>+</sup> MD  
10 genes were mainly associated with TGF- $\beta$ , epithelial to mesenchymal transition and GTPase signaling  
11 pathways, including *Gdf9*, *Tgfb2*, *Jun*, *Mos* and *Bmp15*, which play essential roles in oogenesis (Fig.  
12 2, B and C, and fig. S4B). More detailed analysis revealed that the m<sup>6</sup>A<sup>+</sup> MD genes possess relatively  
13 higher [RRACH] density, and their abundance was higher in oocyte stages, which was consistent with  
14 the observation in *zebrafish(16)* (Fig. 2D and fig. S4D).  
15 Interestingly, we found that approximately 68% of ZGA genes were modified by m<sup>6</sup>A in the late 1-  
16 or 2-cell stages, which indicates that m<sup>6</sup>A was installed along with the transcription of ZGA genes  
17 (Fig. 2A and fig. S4A). Compared to the m<sup>6</sup>A<sup>-</sup> ZGA genes, which are predominately enriched for acid  
18 chemical and amino sugar metabolic process like *Npl* (fig. S4C), m<sup>6</sup>A<sup>+</sup> ZGA genes were strongly  
19 enriched for processes involved in blastocyst development and transcription factor activity, such as  
20 Tet1 (Fig. 2B). Notably, 2-cell marker genes, including *Dux* and *Zscan4*, were found to be marked by  
21 m<sup>6</sup>As when they were reactivated in minor ZGA (Fig. 2E and fig. S4C). Additionally, the [RRACH]  
22 density on m<sup>6</sup>A<sup>+</sup> ZGA genes was higher, and the ZGA genes with m<sup>6</sup>A possessed higher levels of  
23 RNA in early cleavage embryos (Fig. 2F and fig. S4D).

## 24 25 **Kiaa1429-mediated m<sup>6</sup>A modification stabilizes maternal mRNAs**

26 The methylation of m<sup>6</sup>A is mainly dependent on the methyltransferase complex, in which METTL3  
27 and METTL14 work as catalytic cores and interact with WTAP, KIAA1429 (also known as VIRMA),  
28 RBM15/RBM15B, ZC3H13 and other undefined proteins(3, 26). A previous study showed that  
29 KIAA1429 is essential for m<sup>6</sup>A deposition near stop codons and 3'UTRs in human cells (27, 28). Our  
30 collaborators found that loss of Kiaa1429 in oocytes could lead to abnormal RNA metabolism in GV  
31 oocytes and abolished the ability to undergo germinal vesicle breakdown (GVBD)(21), suggesting  
32 that Kiaa1429-mediated RNA metabolism was important for maternal RNAs in mice. To understand  
33 the mechanism, we performed RNA-seq and ULI-MeRIP-seq of GV oocytes from *Kiaa1429<sup>Zp3</sup>*  
34 control and cKO mice (fig. S5, A and B). Consistent with a previous study(21), both the transcriptome  
35 and m<sup>6</sup>A methylome were impacted, and the m<sup>6</sup>A modification in GV oocytes decreased dramatically  
36 when Kiaa1429 was deleted (fig. S5, B to D). Further analysis revealed that the RNA abundance of  
37 m<sup>6</sup>A-marked MD genes was reduced significantly in Kiaa1429-deficient oocytes compared to  
38 unmarked genes (Fig. 2G), suggesting a potential correlation between m<sup>6</sup>A and high abundance of  
39 RNA transcripts in oocytes, which was observed in maternal decay genes. We then identified the  
40 differentially expressed genes (DEGs) between control and *Kiaa1429<sup>Zp3</sup>* cKO oocytes, in which 1869  
41 genes were repressed and 2228 genes were upregulated upon Kiaa1429 depletion (Fig. 2H, fig. S5E,  
42 and table S4). We found that 92.7% of m<sup>6</sup>A-marked MD DEGs were downregulated (294/317),  
43 suggesting the role of m<sup>6</sup>A in maintaining high levels of those genes (Fig. 2H). To verify the change  
44 in transcriptional activity on m<sup>6</sup>A-marked genes, we performed ATAC-seq with the nuclei of control  
45 and *Kiaa1429<sup>Zp3</sup>* cKO GV oocytes. The nucleus of non-surrounded nucleolus (NSN) and partly  
46 surrounded nucleolus (PSN) GV were collected and compared respectively. We compared chromatin

1 accessibility at the promoter region (3 kb around the TSS) of m<sup>6</sup>A+ MD genes and found that the  
2 profiles of ATAC-seq signals between control and *Kiaa1429*<sup>Zp3</sup> cKO oocytes were almost comparable,  
3 suggesting that the transcriptional activity of m<sup>6</sup>A-marked genes was not apparently affected (fig. S5,  
4 F and G). Therefore, the reduced RNA transcripts on m<sup>6</sup>A-marked genes may come from the reduced  
5 stability of RNA but not caused by the regulation of transcription activity. All these data demonstrate  
6 that *Kiaa1429* is essential for m<sup>6</sup>A deposition in GV oocytes and subsequent stabilization of m<sup>6</sup>A-  
7 marked maternal transcripts.

8 Next, we wondered whether *Ythdf2*, like in *zebrafish*, is involved in the RNA decay of maternal  
9 RNAs after fertilization in mice. We used previously established *Ythdf2*<sup>Zp3</sup> cKO mice and observed  
10 2-cell embryo arrest, which is similar to the published study(17). Single-cell RNA-seq was performed  
11 using MII oocytes and 2-cell embryos from *Ythdf2*<sup>Zp3</sup> control and cKO mice (fig. S6, A and B). The  
12 heatmap showed that *Ythdf2* depletion in oocytes repressed the degradation of maternal decay genes  
13 in the 2-cell stage but did not impact RNA abundance in MII oocytes (fig. S6C). However, to our  
14 surprise, not only the degradation of m<sup>6</sup>A+ but also m<sup>6</sup>A- maternal decay genes appeared to be  
15 impacted by *Ythdf2* depletion (fig. S6D). Therefore, the function of *Ythdf2* in MZT may not be  
16 limited to its direct binding to m<sup>6</sup>A but in a more complex manner.

17

### 18 **m<sup>6</sup>A regulates the decay of 2-cell specific ZGA genes**

19 In *zebrafish*, m<sup>6</sup>A was also observed on ZGA genes(16); however, compared to maternal decay genes,  
20 the roles of m<sup>6</sup>As on zygotic mRNAs were barely discussed. As the removal of m<sup>6</sup>A in GV oocytes  
21 can lead to severe defects in folliculogenesis, we have to establish a new platform to realize the  
22 inhibition of de novo m<sup>6</sup>A installation on ZGA genes. Here, we analyzed the expression pattern of the  
23 reported m<sup>6</sup>A methyltransferases and found that *Mettl3* and *Mettl14* were highly expressed in MII  
24 oocytes, but all these genes, including *Mettl16*, possessed considerable RNA levels in the late 1-cell  
25 stage (fig. S7A). Therefore, we injected siRNA or antibodies against all three *Mettl* genes into MII  
26 oocytes to inhibit the function of these proteins (fig. S7B). As a result, the RNA level of *Mettl3/14/16*  
27 was reduced significantly, and the development rate decreased modestly (fig. S7, C and D). RNA-seq  
28 revealed that the RNA level of m<sup>6</sup>A+ ZGA genes in KD embryos was unchanged in the 2-cell stage  
29 but increased at the morula stage (fig. S7E). Transcriptome-wide analysis showed that the  
30 transcriptome of KD embryos was almost comparable to that of control embryos at the 2-cell stage,  
31 but in the morula stage, a group of genes were significantly upregulated upon KD of m<sup>6</sup>A  
32 methyltransferases (Fig. 2I, fig. S7F, and table S5). Interestingly, most of the genes upregulated in  
33 KD morula were 2-cell specific ZGA genes with m<sup>6</sup>A, and many 2C marker genes, including the  
34 *Zscan4* family, were included and possessed higher RNA levels in KD morula (Fig 2i and Extended  
35 Data Fig 7g-h). With these data, we hypothesized that m<sup>6</sup>A may direct the RNA decay of 2-cell  
36 specific ZGA genes to ensure the stage-specific expression of these genes. To prove this, we first  
37 confirmed the decay of *Zscan4* RNA in control embryos at the 4-cell stage when Actinomycin D (1  
38 μg/ml or 5 μg/ml) was used to inhibit transcription (fig. S7I). We then verified that the decay of  
39 *Zscan4* RNA was impaired when the function of m<sup>6</sup>A methyltransferases was inhibited (Fig. 2J). In  
40 summary, our data indicate that installation of m<sup>6</sup>A on 2-cell specific ZGA genes promoted the  
41 clearance of their transcripts to ensure their stage specificity in embryos.

42

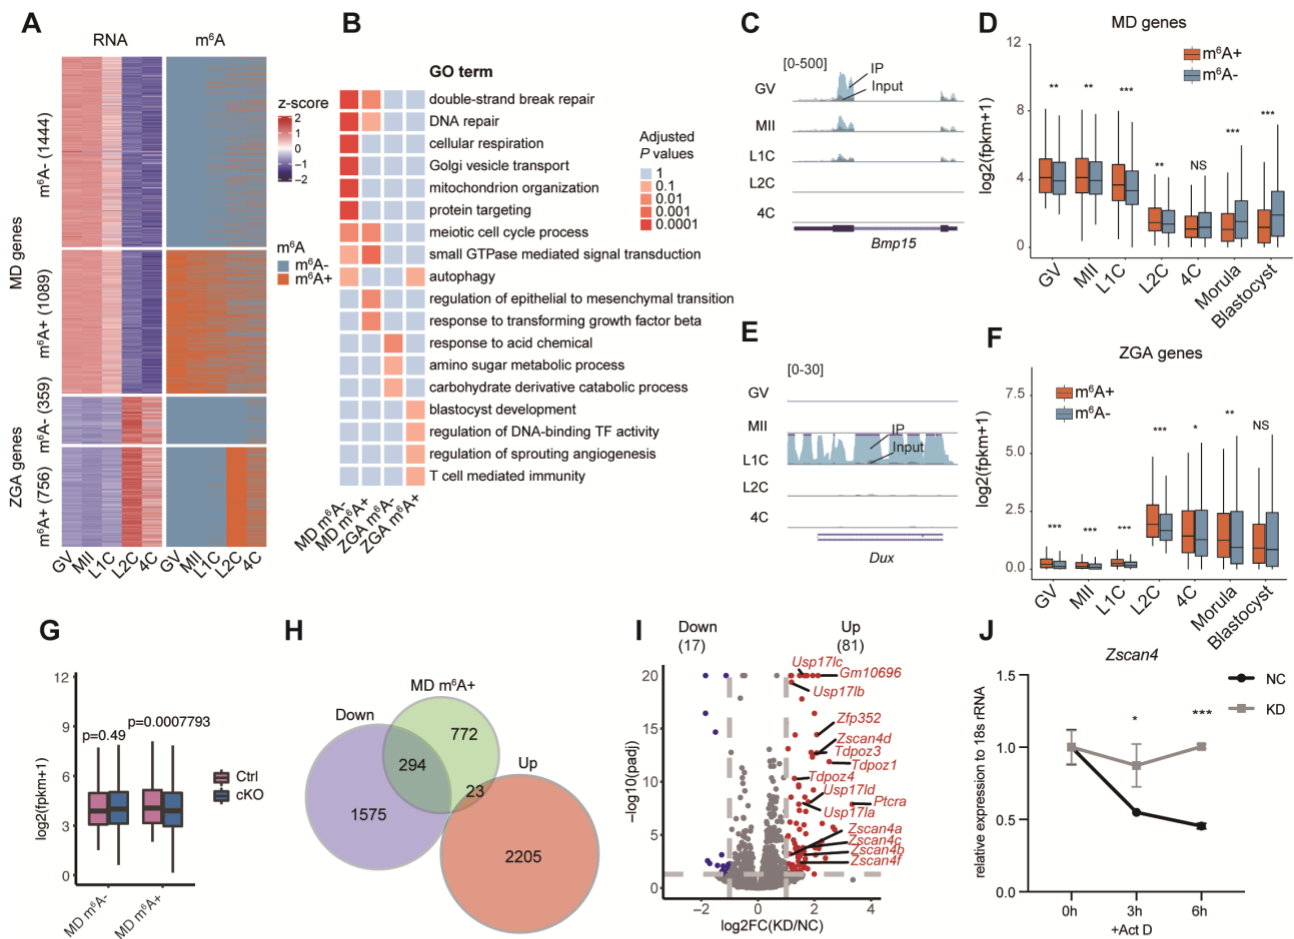

**Fig. 2. Association between m<sup>6</sup>A dynamics and maternal decay genes and ZGA genes during MZT.**

(A) Heatmap showing normalized gene expression (left panel) and m<sup>6</sup>A modification status (right panel) of maternal decay (MD) genes and ZGA genes across different stages. 0 and 1 represent genes without or with m<sup>6</sup>A peaks, respectively. (B) Gene ontology (GO) analysis of the 4 groups of genes according to Fig. 2A. GO terms for each functional cluster were summarized to a representative term, and adjusted p-values were plotted to show the significance. (C) The UCSC browser track showing IP and input reads of m<sup>6</sup>A+ MD gene *Bmp15*. (D) Boxplot showing the expression levels of m<sup>6</sup>A+ and m<sup>6</sup>A- MD genes during early embryo development. (E) The UCSC browser track showing IP and input reads of m<sup>6</sup>A+ ZGA gene *Dux*. (F) Box plot showing the expression levels of m<sup>6</sup>A+ and m<sup>6</sup>A- ZGA genes during early embryo development. (G) Box plot showing the expression levels of m<sup>6</sup>A- and m<sup>6</sup>A+ MD genes in control and *Kiaa1429* cKO GVs. (H) Venn plot showing the overlapping gene number of DEGs in *Kiaa1429* cKO GV and maternal m<sup>6</sup>A+ MD genes. (I) Volcano plot showing DEGs in morula after m<sup>6</sup>A writer *Mettl3*, *Mettl14* and *Mettl16* knockdown. Names of representative 2C genes are marked. KD, writer knockdown; NC, nontarget. (J) Decay rate of *Zscan4* RNA at 4-cell stage. qPCR showed the RNA level of *Zscan4* relative to 18S rRNA at the 4-cell stage with Actinomycin D (Act D) treatment in nontarget and writer knockdown embryos. Error bars indicate mean ± SD.

1  
2

## 1 **Enrichment of m<sup>6</sup>A on the transcripts of transposable elements**

2 Transposable elements (TEs), mainly retrotransposons, are an important component and occupy more  
3 than one-third of the mouse genome(29). The majority of TEs are long interspersed nuclear elements  
4 (LINEs) or short interspersed nuclear elements (SINEs), and approximately 10% of them are long  
5 terminal repeat (LTR) elements, which resemble retroviruses. Many studies have reported the  
6 dynamic stage-specific expression of certain retrotransposons in mouse germ cells and  
7 preimplantation embryos, and some of them, such as MaLR, MERVL and LINE1, reflect a  
8 widespread mechanism for regulating MZT and embryo development(6, 30, 31). Recently, m<sup>6</sup>A was  
9 found to be enriched on the RNA of retrotransposons and regulates their half-life or their interaction  
10 with proteins(12-15). In our data, we noticed the existence and dynamics of m<sup>6</sup>A peaks on transposons  
11 in the MZT process but called for systematic analysis.

12 To start this part, we first isolated the reads located on repetitive RNA and calculated the enrichment  
13 of m<sup>6</sup>A on the subfamilies of TEs (see Methods and fig. S8A). We then calculated the m<sup>6</sup>A enrichment  
14 on different classes of repeats. Generally, m<sup>6</sup>A methylation was mainly enriched in LTR RNAs in all  
15 MZT samples. However, m<sup>6</sup>As in ESCs was mainly enriched in LINE RNAs (fig. S8B). Subsequently,  
16 we analyzed the m<sup>6</sup>A enrichment and expression of the main family in LTR and LINE. As shown,  
17 MaLR and ERVL, LTR class III retrotransposons, possess highly enriched m<sup>6</sup>As in oocytes and early  
18 cleavage embryos, respectively (fig. S8C), which is consistent with their stage-specific expression  
19 features (fig. S8D) (30).

20 To be more precise, we defined all the expressed repeat subfamilies in the MZT process (expression  
21 level >5) (Fig. 3A) and compared their expression and m<sup>6</sup>A dynamics. These TE families were  
22 classified into three clusters, termed maternal TEs, ZGA TEs and mid-preimplantation gene activation  
23 (MGA) TEs, based on their expression pattern from GV oocytes to blastocyst embryos (Fig. 3A).  
24 Most of the maternal TEs, such as MTAs (MTA\_Mm and MTA\_Mm\_int), MT-int and RLTRs, possess  
25 high RNA abundance and enrichment of m<sup>6</sup>A from oocytes to late 1-cell embryos (Fig. 3A).  
26 Meanwhile, all the ZGA TEs, including MERVL (MERVL\_int and MT2\_Mm), MT-int and ORR1As,  
27 possessed high RNA abundance and enrichment of m<sup>6</sup>A from late 1-cell to 4-cell embryos (Fig. 3A).  
28 This observation was similar to the m<sup>6</sup>A+ MD and ZGA genes. Therefore, the role of m<sup>6</sup>A on  
29 retrotransposon RNAs might be similar to that we discovered on coding mRNAs.

30

## 31 **m<sup>6</sup>A facilitates the storage and decay of MTA mRNAs**

32 Among the subfamilies of maternal TEs, MTA, phylogenetically the youngest and most abundant  
33 mouse transcript (MT) subfamily, exhibited the highest RNA intensity in oocytes as well as its  
34 abundance in the genome (Fig. 3, B and C). Previous studies revealed oocyte-abundant mouse  
35 transcript (MT) transposable elements, which are involved in the MaLR family, accounted for over  
36 12% of the total ESTs in the GV oocyte cDNA library(30). Moreover, knockdown of MT transcripts  
37 in GV oocytes or zygotes with pronuclei (PN) affects the GVBD rate or causes cleavage arrest(32),  
38 suggesting that MT transposable elements play critical roles in oocyte maturation and early embryo  
39 development. Therefore, we mainly focused on MTA in further study.

40 By checking individual TE copies, we testified that almost all intact MTAs with high expression,  
41 divided into 5 clusters based on the expression level, are marked by m<sup>6</sup>A peaks from GV oocytes to  
42 late 1-cell embryos, in which canonical [RRACH] motifs were highly enriched (Fig. 3D and fig. S8,  
43 E and F). The profiling of m<sup>6</sup>A on MTA during MZT not only showed continuous demethylation after  
44 the zygote stage but also exhibited a significant m<sup>6</sup>A density shift from TES to TSS in MII oocytes  
45 and late 1-cell embryos (Fig. 3, E and F). Moreover, this result can be repeated when unique mapping  
46 was performed for data analysis (data not shown). Considering that the MTA RNAs stored in GV



1 oocytes will readily decay in matured or fertilized oocytes, the “shift” of m<sup>6</sup>A peaks suggests that  
2 region-specific m<sup>6</sup>A deposition might be important for m<sup>6</sup>A-mediated regulation.  
3 We also checked the behavior of MTA transcripts in *Kiaa1429<sup>Zp3</sup>* cKO oocytes. In addition to the loss  
4 of m<sup>6</sup>A, the dramatically decreased RNA abundance on MTA copies was much more severe than that  
5 observed on m<sup>6</sup>A-marked genes when *Kiaa1429* was depleted (Fig. 3, G and H and fig. S8G). We  
6 also compared the ATAC-seq signals of the clustered MTAs with different expression levels and  
7 excluded the potential impact of transcriptional activity (fig. S8H). These results indicate that m<sup>6</sup>As  
8 on MTA elements was extremely important for maintaining a high abundance of MTA RNA in GV  
9 oocytes, and the loss of MTA RNA may also contribute to the abolished oocyte competence in  
10 *Kiaa1429* cKO mice.  
11 We further checked the RNA level of MTA in MII and 2-cell samples and found that the decay of  
12 MTA was blocked in *Ythdf2<sup>Zp3</sup>* cKO embryos, which suggests that *Ythdf2* regulates the degradation  
13 of MTA in fertilized embryos (Fig. 3I).  
14

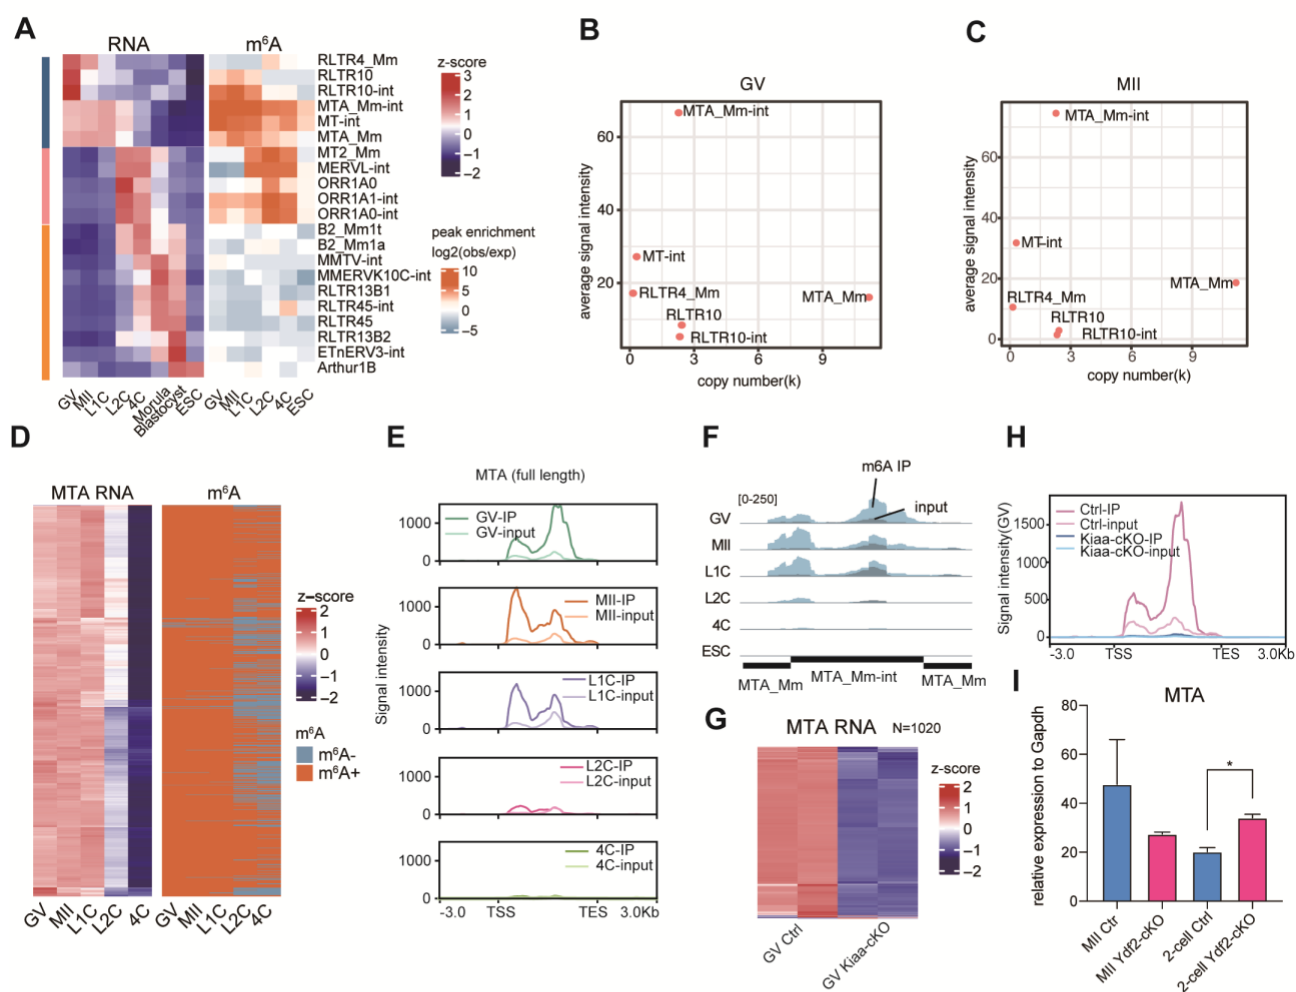

**Fig. 3. m<sup>6</sup>A is indispensable for the high RNA level of maternal TE MTA**

(A) Heatmap of normalized RNA levels (left panel) and m<sup>6</sup>A enrichment scores (right panel) of all expressed transposon elements. Expressed transposon elements were defined as those with a mean expression level greater than 5. Pink, yellow and dark blue bars on the left represent 3 clusters of TEs according to expression pattern. (B and C) Plots showing average RNA level and genomic copy number for maternally expressed TEs in GV and MII, respectively. (D) Heatmap showing the normalized RNA level and m<sup>6</sup>A peak status of full-length MTA copies. (E) Average profile of m<sup>6</sup>A IP and input signal of full-length MTA during MZT. (F) The UCSC browser track showing IP and input reads of MTA during MZT. (G) Heatmap showing the normalized MTA RNA level of each copy during MZT in WT mice and GV oocytes of *Kiaa1429* control and maternal cKO mice. (H) Average m<sup>6</sup>A IP and input signal in control and *Kiaa1429* Zp3-cKO GV oocytes at MTA. The IP and input signal were scaled by GLuc and CLuc spike-ins, respectively. (I) MTA RNA levels in MII oocytes and 2-cell embryos of control and *Ythdf2* maternal cKO mice quantified by qPCR. Error bars indicate mean ± s.e.m.

1  
2

## 1 **m<sup>6</sup>A regulates the decay of MERVL RNA**

2 Among the subfamilies of defined ZGA TEs, MERVL, the most representative 2-cell retrotransposon  
3 element, exhibited the highest RNA intensity and genome abundance in 2-cell and 4-cell stage  
4 embryos (Fig 4a-b). Again, we divided all intact MERVL copies into 5 clusters based on their  
5 expression level and calculated the m<sup>6</sup>A profile on MERVL. Here, we observed that the deposition of  
6 m<sup>6</sup>A appeared at the late 1-cell stage and increased in the 2-cell and 4-cell stages (Fig. 4C and fig. S9,  
7 A to D). Similar to the 2-cell marker gene *Zscan4*, the RNA level of MERVL at the morula stage also  
8 increased significantly when the function of m<sup>6</sup>A methyltransferases was impaired (Fig. 4D and fig.  
9 S9E). A decay assay at the 4-cell stage demonstrated that RNA decay of the MERVL transcripts was  
10 inhibited when m<sup>6</sup>A writers were knocked down (Fig. 4E). To further validate the direct regulatory  
11 role of m<sup>6</sup>A on MERVL RNAs, we employed the dCas13b-ALKBH5 system in embryos(33) (fig.  
12 S9F). By coinjection of dCas13b-ALKBH5 mRNA and multiple gRNAs targeting MERVL (fig. S9G),  
13 we observed decreased m<sup>6</sup>A on MERVL at the 2-cell stage embryos and increased MERVL transcripts  
14 at the 4-cell stage, which was validated by MeRIP-qPCR and RT-qPCR, respectively (Fig. 4F and fig.  
15 S9H). Our data uncovered a conservative regulatory mechanism on ZGA genes and TEs, in which  
16 m<sup>6</sup>A regulated the decay of MERVL in 4-cell stage embryos.

17  
18 In this study, we first developed an ultralow-input MeRIP-seq (ULI-MeRIP-seq) method, which  
19 enabled the profiling of m<sup>6</sup>A RNA methylation in mouse oocytes and preimplantation embryos. Our  
20 study not only generated the highly dynamic landscape of m<sup>6</sup>A on both coding and repetitive RNAs  
21 but also uncovered various roles of m<sup>6</sup>As during MZT: keeping maternal mRNAs stable and  
22 promoting decay of 2C-specific mRNAs (Fig. 4G). Importantly, our data on MTA and MERVL  
23 highlighted the timely storage and clearance of transposable elements through m<sup>6</sup>A-mediated  
24 posttranscriptional regulation, which may also play important roles in multiple developmental events.

25  
26  
27

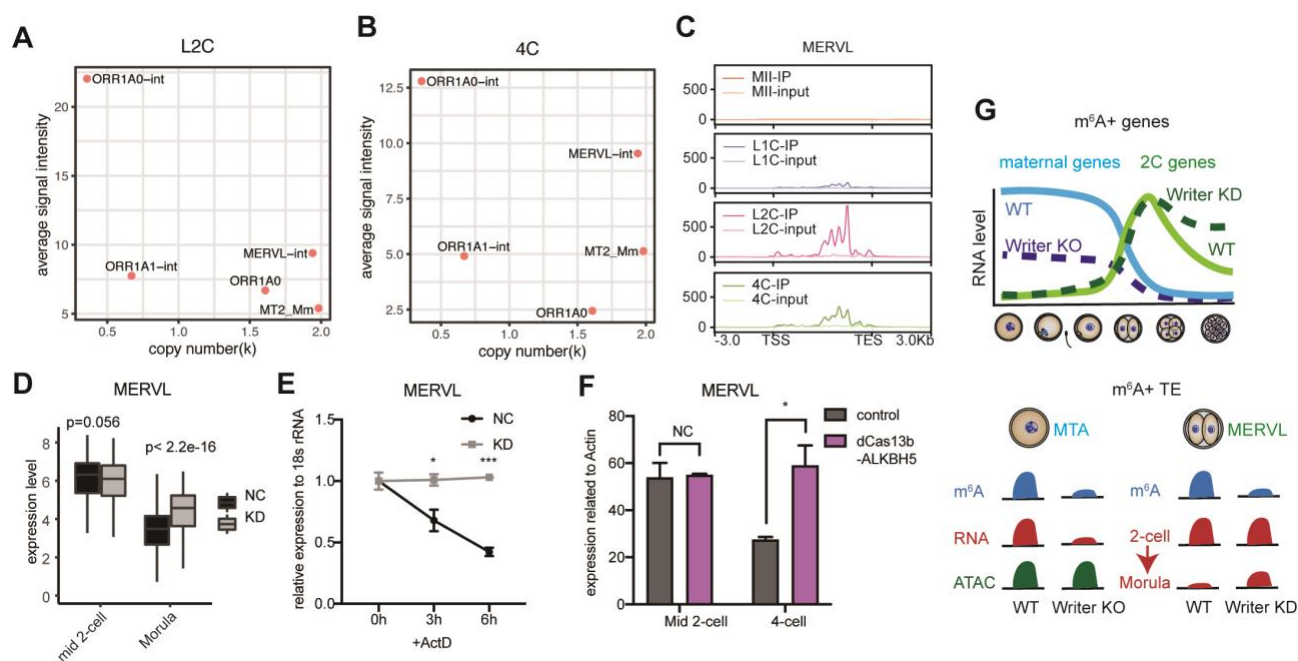

**Fig. 4. m<sup>6</sup>A promotes degradation of MERVL transcripts.**

(A and B) Plots showing the average RNA level and genomic copy number for ZGA TEs in 2-cell and 4-cell embryos, respectively. (C) Average profile of m<sup>6</sup>A IP and input signal of ERVL during MZT. (D) Expression level of MERVL copies in nontarget and writer KD samples in middle 2-cell and morula. (E) Decay rate of MERVL RNA at the 4-cell stage in nontarget and knockdown embryos tested by qPCR with Act D treatment. Error bars indicate mean  $\pm$ SD. \*, p-value<0.05, \*\*\* p-value<0.001. (F) MERVL RNA levels quantified by qPCR in the middle 2-cell and 4-cell embryos of control and dCas13b-ALKBH5 with gRNAs targeting MERVL. Error bars indicate mean  $\pm$  SD. (G) Schematic diagram of m<sup>6</sup>A function in transcripts of genes and TEs during MZT. m<sup>6</sup>A+ maternal genes are downregulated when m<sup>6</sup>A writers are depleted in oocytes. m<sup>6</sup>A methylation promotes mRNA degradation of 2C genes after the 2-cell stage. Maternal MTA elements with m<sup>6</sup>A modification are highly expressed in oocytes. Kiaa1429 m<sup>6</sup>A writer knockout results in downregulation of MTA RNA without a change in chromatin accessibility. MERVL transcripts are highly modified by m<sup>6</sup>As, which control its RNA degradation after 2 cells.

## 1 **References and Notes:**

- 2 1. Y. Yue, J. Liu, C. He, RNA N6-methyladenosine methylation in post-transcriptional gene expression regulation. *Genes Dev* **29**, 1343-1355 (2015).
- 3
- 4 2. I. A. Roundtree, M. E. Evans, T. Pan, C. He, Dynamic RNA Modifications in Gene Expression Regulation. *Cell* **169**,
- 5 1187-1200 (2017).
- 6 3. S. Zaccara, R. J. Ries, S. R. Jaffrey, Reading, writing and erasing mRNA methylation. *Nat Rev Mol Cell Biol* **20**,
- 7 608-624 (2019).
- 8 4. H. Shi, J. Wei, C. He, Where, When, and How: Context-Dependent Functions of RNA Methylation Writers,
- 9 Readers, and Erasers. *Mol Cell* **74**, 640-650 (2019).
- 10 5. H. Coker, G. Wei, N. Brockdorff, m6A modification of non-coding RNA and the control of mammalian gene
- 11 expression. *Biochim Biophys Acta Gene Regul Mech* **1862**, 310-318 (2019).
- 12 6. M. A. Eckersley-Maslin, C. Alda-Catalinas, W. Reik, Dynamics of the epigenetic landscape during the maternal-
- 13 to-zygotic transition. *Nat Rev Mol Cell Biol* **19**, 436-450 (2018).
- 14 7. M. Christou-Kent, M. Dhellemmes, E. Lambert, P. F. Ray, C. Arnoult, Diversity of RNA-Binding Proteins
- 15 Modulating Post-Transcriptional Regulation of Protein Expression in the Maturing Mammalian Oocyte. *Cells* **9**,
- 16 (2020).
- 17 8. D. Clift, M. Schuh, Restarting life: fertilization and the transition from meiosis to mitosis. *Nat Rev Mol Cell Biol*
- 18 **14**, 549-562 (2013).
- 19 9. D. Dominissini *et al.*, Topology of the human and mouse m6A RNA methylomes revealed by m6A-seq. *Nature*
- 20 **485**, 201-206 (2012).
- 21 10. S. Xiao *et al.*, The RNA N(6)-methyladenosine modification landscape of human fetal tissues. *Nat Cell Biol* **21**,
- 22 651-661 (2019).
- 23 11. G. Cao, H. B. Li, Z. Yin, R. A. Flavell, Recent advances in dynamic m6A RNA modification. *Open Biol* **6**, 160003
- 24 (2016).
- 25 12. W. Xu *et al.*, METTL3 regulates heterochromatin in mouse embryonic stem cells. *Nature* **591**, 317-321 (2021).
- 26 13. T. Chelmicki *et al.*, m(6)A RNA methylation regulates the fate of endogenous retroviruses. *Nature* **591**, 312-316
- 27 (2021).
- 28 14. J. Liu *et al.*, N (6)-methyladenosine of chromosome-associated regulatory RNA regulates chromatin state and
- 29 transcription. *Science* **367**, 580-586 (2020).
- 30 15. J. Liu *et al.*, The RNA m(6)A reader YTHDC1 silences retrotransposons and guards ES cell identity. *Nature* **591**,
- 31 322-326 (2021).
- 32 16. B. S. Zhao *et al.*, m(6)A-dependent maternal mRNA clearance facilitates zebrafish maternal-to-zygotic transition.
- 33 *Nature* **542**, 475-478 (2017).
- 34 17. I. Ivanova *et al.*, The RNA m(6)A Reader YTHDF2 Is Essential for the Post-transcriptional Regulation of the
- 35 Maternal Transcriptome and Oocyte Competence. *Mol Cell* **67**, 1059-1067 e1054 (2017).
- 36 18. M. Deng *et al.*, YTHDF2 Regulates Maternal Transcriptome Degradation and Embryo Development in Goat. *Front*
- 37 *Cell Dev Biol* **8**, 580367 (2020).
- 38 19. S. Geula *et al.*, Stem cells. m6A mRNA methylation facilitates resolution of naive pluripotency toward
- 39 differentiation. *Science* **347**, 1002-1006 (2015).
- 40 20. M. Mendel *et al.*, Methylation of Structured RNA by the m(6)A Writer METTL16 Is Essential for Mouse
- 41 Embryonic Development. *Mol Cell* **71**, 986-1000 e1011 (2018).
- 42 21. Y. Hu *et al.*, Oocyte competence is maintained by m(6)A methyltransferase KIAA1429-mediated RNA
- 43 metabolism during mouse follicular development. *Cell Death Differ* **27**, 2468-2483 (2020).
- 44 22. S. D. Kasowitz *et al.*, Nuclear m6A reader YTHDC1 regulates alternative polyadenylation and splicing during
- 45 mouse oocyte development. *PLoS Genet* **14**, e1007412 (2018).
- 46 23. T. G. Meng *et al.*, Mettl14 is required for mouse postimplantation development by facilitating epiblast

- 1 maturation. *FASEB J* **33**, 1179-1187 (2019).
- 2 24. Y. Zeng *et al.*, Refined RIP-seq protocol for epitranscriptome analysis with low input materials. *PLoS Biol* **16**,  
3 e2006092 (2018).
- 4 25. P. J. Batista *et al.*, m(6)A RNA modification controls cell fate transition in mammalian embryonic stem cells. *Cell*  
5 *Stem Cell* **15**, 707-719 (2014).
- 6 26. Y. Yang, P. J. Hsu, Y. S. Chen, Y. G. Yang, Dynamic transcriptomic m(6)A decoration: writers, erasers, readers and  
7 functions in RNA metabolism. *Cell Res* **28**, 616-624 (2018).
- 8 27. Y. Yue *et al.*, VIRMA mediates preferential m(6)A mRNA methylation in 3'UTR and near stop codon and  
9 associates with alternative polyadenylation. *Cell Discov* **4**, 10 (2018).
- 10 28. S. Schwartz *et al.*, Perturbation of m6A writers reveals two distinct classes of mRNA methylation at internal and  
11 5' sites. *Cell Rep* **8**, 284-296 (2014).
- 12 29. C. Mouse Genome Sequencing *et al.*, Initial sequencing and comparative analysis of the mouse genome. *Nature*  
13 **420**, 520-562 (2002).
- 14 30. A. E. Peaston *et al.*, Retrotransposons regulate host genes in mouse oocytes and preimplantation embryos. *Dev*  
15 *Cell* **7**, 597-606 (2004).
- 16 31. W. D. Gifford, S. L. Pfaff, T. S. Macfarlan, Transposable elements as genetic regulatory substrates in early  
17 development. *Trends Cell Biol* **23**, 218-226 (2013).
- 18 32. C. E. Park *et al.*, Oocyte-selective expression of MT transposon-like element, clone MTi7 and its role in oocyte  
19 maturation and embryo development. *Mol Reprod Dev* **69**, 365-374 (2004).
- 20 33. J. Li *et al.*, Targeted mRNA demethylation using an engineered dCas13b-ALKBH5 fusion protein. *Nucleic Acids*  
21 *Res* **48**, 5684-5694 (2020).
- 22 34. M. R. Corces *et al.*, An improved ATAC-seq protocol reduces background and enables interrogation of frozen  
23 tissues. *Nat Methods* **14**, 959-962 (2017).
- 24 35. J. Wu *et al.*, The landscape of accessible chromatin in mammalian preimplantation embryos. *Nature* **534**, 652-  
25 657 (2016).
- 26 36. F. Tang *et al.*, mRNA-Seq whole-transcriptome analysis of a single cell. *Nat Methods* **6**, 377-382 (2009).
- 27 37. F. Tang *et al.*, RNA-Seq analysis to capture the transcriptome landscape of a single cell. *Nat Protoc* **5**, 516-535  
28 (2010).
- 29 38. D. Kim, B. Langmead, S. L. Salzberg, HISAT: a fast spliced aligner with low memory requirements. *Nature*  
30 *methods* **12**, 357-360 (2015).
- 31 39. C. Trapnell *et al.*, Transcript assembly and quantification by RNA-Seq reveals unannotated transcripts and  
32 isoform switching during cell differentiation. *Nature biotechnology* **28**, 511-515 (2010).
- 33 40. M. I. Love, W. Huber, S. Anders, Moderated estimation of fold change and dispersion for RNA-seq data with  
34 DESeq2. *Genome biology* **15**, 550 (2014).
- 35 41. F. Ramírez *et al.*, deepTools2: a next generation web server for deep-sequencing data analysis. *Nucleic Acids*  
36 *Research* **44**, W160-W165 (2016).
- 37 42. Y. Zhang *et al.*, Model-based Analysis of ChIP-Seq (MACS). *Genome biology* **9**, R137 (2008).
- 38 43. S. Heinz *et al.*, Simple combinations of lineage-determining transcription factors prime cis-regulatory elements  
39 required for macrophage and B cell identities. *Mol Cell* **38**, 576-589 (2010).
- 40 44. G. Yu, L.-G. Wang, Y. Han, Q. J. O. a. j. o. i. b. He, clusterProfiler: an R package for comparing biological themes  
41 among gene clusters. **16** **5**, 284-287 (2012).
- 42 45. A. F. A. Smit, Identification of a new, abundant superfamily of mammalian LTR-transposons. *Nucleic Acids*  
43 *Research* **21**, 1863-1872 (1993).
- 44 46. I. A. Maksakova *et al.*, Distinct roles of KAP1, HP1 and G9a/GLP in silencing of the two-cell-specific  
45 retrotransposon MERVL in mouse ES cells. *Epigenetics & Chromatin* **6**, 15 (2013).
- 46 47. B. Langmead, S. L. Salzberg, Fast gapped-read alignment with Bowtie 2. *Nature methods* **9**, 357-359 (2012).

- 1 48. C.-N. Members, Partners, Database Resources of the National Genomics Data Center, China National Center for  
2 Bioinformation in 2021. *Nucleic Acids Research* **49**, D18-D28 (2020).
- 3 49. Y. Wang *et al.*, GSA: Genome Sequence Archive\*. *Genomics, Proteomics & Bioinformatics* **15**, 14-18 (2017).
- 4
- 5
- 6
- 7
- 8

1 **Acknowledgments:**

2 We thank Dr.C.He for the suggestion on the project. We thank Dr.R,Le for helpful advice on  
3 manuscript. Thank Dr,C.Ning. for the help with bioinformatic analysis. Thank Dr.H,Wang for  
4 providing the dCas13b-ALKBH5 plasmid. **Fundings:** This work was supported by the National  
5 Key R&D Program of China (2016YFA0100400, 2020YFA0113200, 2018YFA0108900 and  
6 2016YFC1000600), the National Natural Science Foundation of China (31922022, 31771646,  
7 31721003, 32000418, 31970796)), the Shanghai Municipal Medical and Health Discipline  
8 Construction Projects (2017ZZ02015), the Fundamental Research Funds for the Central  
9 Universities (1515219049 and 22120200410), the Major Program of the Development Fund for  
10 Shanghai Zhangjiang National Innovation Demonstration Zone (ZJ2018-ZD-004), China  
11 Postdoctoral Science Foundation (2020M681382).

12 **Author contributions:** YG and SG designed project and directed all the experiments and  
13 bioinformatics analyses. BS provided advice and designed conditional knockout mice. YW carried  
14 out most experiments. XX carried out most bioinformatics analyses. MQ and ML carried out  
15 generation, breeding and genotyping of *Kiaa1429<sup>Zp3-cKO</sup>* mice and *Ythdf2<sup>Zp3-cKO</sup>* mice. YW and CC  
16 developed ULI- MeRIP-seq method. MQ and BS performed mini-ATAC on oocyte. RY and XL  
17 helped with embryo collection. WL, XK and YZ performed siRNA microinjection to embryos. MZ  
18 and CY performed LC-MS/MS for quantification of m<sup>6</sup>A level in embryos. HW helped with cell  
19 culture work. YG, YW, XX and SG wrote the manuscript with input from all authors.

20 **Competing interests:** The authors declare no competing interests.

21 **Data and materials availability:** All data are available in the main text or the supplementary  
22 materials. All the MeRIP-seq, RNA-seq and ATAC-seq data generated in this study are summarized  
23 in Supplementary Table 1. The accession number for the sequencing data reported in this paper is  
24 GSA: CRA003985. These data have been deposited in the Genome Sequence Archive(48, 49) under  
25 project PRJCA004536. The shared URL for review is: <https://bigd.big.ac.cn/gsa/s/v9YicRas>.

26  
27 **Supplementary Materials**

28 Materials and Methods

29 Figs. S1 to S9

30 Tables S1 to S7

31 References (36–49)

32

33

34
